# Supplementary material for: Non-Destructive Biomass Estimation in Mediterranean Alpha Steppes: Improving Traditional Methods for Measuring Dry and Green Fractions by Combining Proximal Remote Sensing Tools
Source: MDPI journal article supplement (doi:10.3390/rs13152970), 2021-07-28
Supplement: s1 [file s1]

Archive with 1 entries (1 files):
- remotesensing-1262354-supplementary.pdf
